# Supplementary material for: Patients’ User Experience of a Blended Face-to-Face and Web-Based Smoking Cessation Treatment: Qualitative Study
Source: PubMed Central journal article supplement (PMC7301265; doi:10.2196/14550), 2020-06-03
Supplement: formative_v4i6e14550_app1.pdf [file formative_v4i6e14550_app1.pdf]

# Multimedia Appendix 1. Screenshots of the web-sessions of BSCT

In the following, screenshots of the web-sessions of BSCT are provided in order to give an impression of its look and feel. Note: The language of the web content is Dutch. Therefore a comprehensive English description is added.

## Landing page

The landing page at [www.rokendebaas.nl](http://www.rokendebaas.nl) offers the possibilities to register and log in, to follow a “demo-treatment” and to find information about smoking and smoking cessation.

The screenshot shows the landing page of the website 'ROKEN DE BAAS INTERNETBEHANDELING .NL'. The page features a navigation menu with links for 'Home', 'Contact', and 'Sitemap', along with a search bar. A green navigation bar contains links for 'Online behandeling', 'Stoppen', 'U en roken', 'En zij dan?', 'Forum', 'Feiten', 'Andere hulp', and 'Over ons'. The main content area is divided into several sections: a welcome message, a registration button ('Aanmelden'), a question submission button ('Stel uw vraag!'), a login section ('Inloggen'), and a demo treatment button ('Demo behandeling'). A large image of a smiling man is featured on the right side. The footer includes a colophon, disclaimer, and privacy policy, along with ISO 9001 and ISO 27001 certification logos and the text 'developed by tactive'.

ROKEN DE BAAS  
INTERNETBEHANDELING .NL

> Home > Contact > Sitemap a → A

Zoeken

Online behandeling | Stoppen | U en roken | En zij dan? | Forum | Feiten | Andere hulp | Over ons

Welkom bij  
**Rokendebaas.nl**

Overweegt u wel eens te stoppen met roken? Deze website is ontwikkeld voor mensen die zich zorgen maken over het roken. U kunt hier een online behandeling volgen om u te helpen. Ook vindt u hier tips en informatie over roken.

**Aanmelden**  
Begin direct en meldt u nu aan. Vul hier de intake in.

**Stel uw vraag!**  
Een hulpverlener van Rokendebaas.nl geeft antwoord.

WAAR OF NIET WAAR? > Met een sigaret kan ik even ontspannen

> Meld u nu aan  
Start direct en vul de vragenlijst in.

**Demo behandeling** →

**Inloggen** %

Inlognaam  
Wachtwoord Verder  
> Wachtwoord vergeten

Colofon | Disclaimer | Privacy beleid

developed by **tactive**

ISO 9001 - HKZ  
ISO 27001

## Starting page of the treatment

Once logged in, patients choose to proceed with going to their record (“Dossier”), to the smoking self-recording (“Rookschrift”), or the to the forum to exchange with peers. In addition, if new messages (from example from the counselor) are available is also displayed here (“Berichten”).

The screenshot shows the starting page of the 'ROKEN DE BAAS .nl' internet treatment. The page is divided into several sections:

- Header:** 'ROKEN DE BAAS .nl' logo with 'INTERNETBEHANDELING' below it.
- Internetbehandeling:** A blue box containing:
  - Dossier →** (red button)
  - Rookschrift →** (red button)
  - Text: 'Via uw dossier heeft u contact met uw hulpverlener. Hier ontvangt en verstuurt u berichten en doorloopt u de verschillende behandelstappen. In het rookschrift houdt u bij wanneer u zin heeft in roken en hoeveel u gerookt heeft.'
  - Berichten:** A box stating 'Je hebt geen ongelezen bericht...'
- Forum:** A blue box with a flag icon containing:
  - Text: 'Op het forum van Rokendebas.nl kunt u in contact komen met anderen en bespreken hoe zij hun rookprobleem aanpakken. U kunt hier berichten lezen en plaatsen, zodat u ervaringen kunt delen en uw situatie kunt bespreken.'
  - [Naar het forum](#)
- Notificaties:** A green box with an envelope icon containing:
  - Text: 'Hier kunt u instellen of u een notificatie wilt ontvangen wanneer er een nieuw bericht in uw dossier is geplaatst.'
  - Two radio button options:
    - Ja, ik wil per email op de hoogte worden gesteld van nieuwe berichten
    - Ja, ik wil per SMS op de hoogte worden gesteld van nieuwe berichten
- Inloggen:** A blue box on the right containing:
  - Text: 'U bent ingelogd als: test\_test'
  - [Uitloggen](#) button

At the bottom, there is a footer with 'Colofon | Disclaimer | Privacy beleid' and a logo for 'developed by **tactive**'.

## Inbox

This is the inbox of the integrated messaging system for patients and counselors. In addition, patients can go directly to their smoking self-recording (Rookschrift”) and to the interventions which are already unblocked by the counselors. In this case, the patient could go directly to “Goal setting (“Doel stellen - ...”) or to “Measuring and Knowing (“Meten en weten”.

The screenshot shows a web interface for a patient's inbox. At the top left, it identifies the counselor as 'Je hulpverlener: Lutz Siemer' with the email 'test\_test'. The top right features the 'ROKEN DE BAAS' logo and the text 'INTERNETBEHANDELING'. Below the header, there are navigation buttons: 'Handleiding', 'Nieuw bericht', 'a → A', and 'Afsluiten'. The main area is divided into three sections: a left sidebar, a top status bar, and a central inbox table.

**Left Sidebar:**

- Rookschrift** (laatste registratiedatum: 02-02-2015)
- Print lege lijst
- Meting 0** (checked)
  - Voordelen, nadelen
  - Rookschrift bijhouden
  - Doel stellen - Direct stoppen
  - Doel stellen - Stapsg. verander
  - Doel stellen - Stapsg. afbouw
  - Doel stellen - Afbouwen en st
  - Situaties analyseren
  - Meten en weten**
  - Gewoontes doorbreken

**Top Status Bar:**

- Postvak IN (0)
- Verzonden (0)
- Concepten (0)
- Prullenbak (0)

**Inbox Table:**

| Onderwerp                 | Datum            |   |
|---------------------------|------------------|---|
| Meting 4                  | 11-08-2015 13:28 | ✕ |
| Meting 3                  | 11-08-2015 13:27 | ✕ |
| Gecorrigeerde meting 2    | 11-08-2015 13:22 | ✕ |
| meting 2                  | 11-08-2015 13:20 | ✕ |
| Meting 1                  | 11-08-2015 13:19 | ✕ |
| test E                    | 04-02-2015 09:20 | ✕ |
| RE: RE: link              | 04-02-2015 09:17 | ✕ |
| link                      | 04-02-2015 09:04 | ✕ |
| Doelstellen               | 27-01-2015 12:56 | ✕ |
| Welkom bij Rokendebaas.nl | 22-01-2015 13:17 | ✕ |

The 'tactive' logo is visible in the bottom right corner of the interface.

## Reading messages

The inbox after opening a message. Patients have the option to reply, print or close the message.

The screenshot displays a patient portal interface. At the top left, it identifies the patient as 'Je hulpverlener: Lutz Siemer test\_test'. The top right features the logo for 'ROKEN DE BAAS INTERNETBEHANDELING'. Below the header, there are navigation buttons: 'Handleiding', 'Nieuw bericht', 'a → A', and 'Afsluiten'. The main area is divided into three sections:

- Left sidebar:** Contains a 'Rookschrift' section with the last registration date '02-02-2015' and a 'Print lege lijst' button. Below this is a list of items under 'Meting 0', including 'Voordelen, nadelen', 'Rookschrift bijhouden', 'Doel stellen - Direct stoppen', 'Doel stellen - Stapsg. verander...', 'Doel stellen - Stapsg. afbouw...', 'Doel stellen - Afbouwen en st...', 'Situaties analyseren', and 'Meten en weten' (with sub-item 'Gewoontes doorbreken').
- Top center:** Shows folder counts: 'Postvak IN (0)', 'Verzonden (0)', 'Concepten (0)', and 'Prullenbak (0)'.
- Center:** An email list table with columns 'Onderwerp' and 'Datum'.

| Onderwerp              | Datum            |
|------------------------|------------------|
| Gecorrigeerde meting 2 | 11-08-2015 13:22 |
| meting 2               | 11-08-2015 13:20 |
| Meting 1               | 11-08-2015 13:19 |
| test E                 | 04-02-2015 09:20 |
| RE: RE: link           | 04-02-2015 09:17 |
- Bottom center:** A message preview window titled 'Bericht lezen' with buttons for 'Beantwoorden', 'Printen', and 'Sluiten'. The message content is:

Verzonden op: 27-01-2015

Beste Lutz,

Zoals afgesproken stuur ik je vandaag informatie en een opdracht.

Je neemt deel aan de behandeling Rookvrij Leven. Deze behandeling is ontwikkeld voor mensen die willen stoppen met roken. Het doel is dat je de controle terug krijgt, niet meer afhankelijk bent van het roken. Als je op dit moment al gestopt bent of geminderd hebt, is dat natuurlijk heel goed. Het behandelprogramma zal je ook dan zeker wat opleveren en helpen de verandering vol te houden.

The 'tactive' logo is visible in the bottom right corner.

## Goal setting

This is the first page of the goal setting intervention where the patient is asked to think about what he/she wants to achieve precisely. In addition, four tips for goal setting are provided.

Doel stellen Minimaliseren Sluiten

Print deze opdracht

**Wat wil je precies bereiken? Vier tips bij het stellen van een doel.**

1. Stel concrete, meetbare tussendoelen. 'Een beetje afbouwen' of 'niet meer zo veel roken' geeft geen duidelijke richtlijn en zal je weinig winst opleveren. Benoem duidelijk wat je wilt bereiken en zorg ervoor dat je doel maar op één manier uit te leggen is.
2. Houd je tussendoelen reëel. Een eerste tussendoel als 'vanaf morgen rook ik nooit meer', is niet erg realistisch. Het niet te verwachten dat je je rookgewoonte zonder een goede voorbereiding van de ene op de andere dag kunt veranderen. Stel dus realistische eisen aan jezelf en verdeel je doel onder in kleine, concrete en haalbare tussendoelen.
3. De stappen die je onderneemt om je doel te bereiken, zeggen iets over wat jij gaat doen. Dit betekent dus dat het om actieve handelingen gaat, stappen die je zet om je einddoel te bereiken: rookvrij zijn. Kies een verantwoord doel, waarbij je de voordelen en nadelen goed hebt afgewogen.
4. Ook het tijdsplan is van belang. Spreek met jezelf af hoelang je je nieuwe rookgewoonte gaat uitproberen. Gun jezelf de tijd om te wennen aan je nieuwe rookgewoonte.

1 2 3 4 5 6

Volgende →

Why do you want to stop smoking (“Waarom wil je stoppen met roken”)?

The second page of the goal setting intervention where the patient is asked to fill in as many reasons as possible and to do this as precisely as possible.

Doel stellen Minimaliseren Sluiten

Print deze opdracht

**1** **Waarom wil je stoppen met roken?**  
Geef zoveel mogelijk redenen aan en wees zo concreet mogelijk  
Mijn redenen om te stoppen met roken zijn:

1. volgende week niet meer dan een pack cigarettten alle twee dagen kopen

2. een week verder dann alleen nog 5 cigarettten per dag, dus een pack alle vier dagen kopen

3.

4.

5.

6.

7.

8.

9.

10.

← Vorige 1 2 3 4 5 6 Volgende →

## Final goal (“Einddoel”)

Third page of the Goal setting intervention, where the patient is asked if he/she will fix a stop date (Einddoel”) and which smokefree activities he/she will do when (“mijn volgende stap naar mijn einddoel”).

Doel stellen Minimaliseren Sluiten

Print deze opdracht

**2 Einddoel**  
Wil je een stopdatum vaststellen?  
 Nee  
 Ja  
Ik ben rookvrij vanaf: 1-3-2016

**3 Mijn volgende stap naar mijn einddoel**  
De volgende activiteiten doe ik in het vervolg rookvrij:  
1. nie tmeer in huis roken  
2.  
3.  
4.  
5.  
Startdatum: 2-2-2015  
Ik ga hiermee door tot: 28-2-2015  
Als je wilt, kun je hieronder je doelstelling nog toelichten:

← Vorige 1 2 3 4 5 6 Volgende →

## More goals

Fourth page of the goal setting interventions where the patient may add more goals and activities.



## Smoking self-recording

Overview of the smoking self-recording (“Overzicht registratie”) where the patient’s registry of numbers of cigarettes and the moment descriptions are displayed.

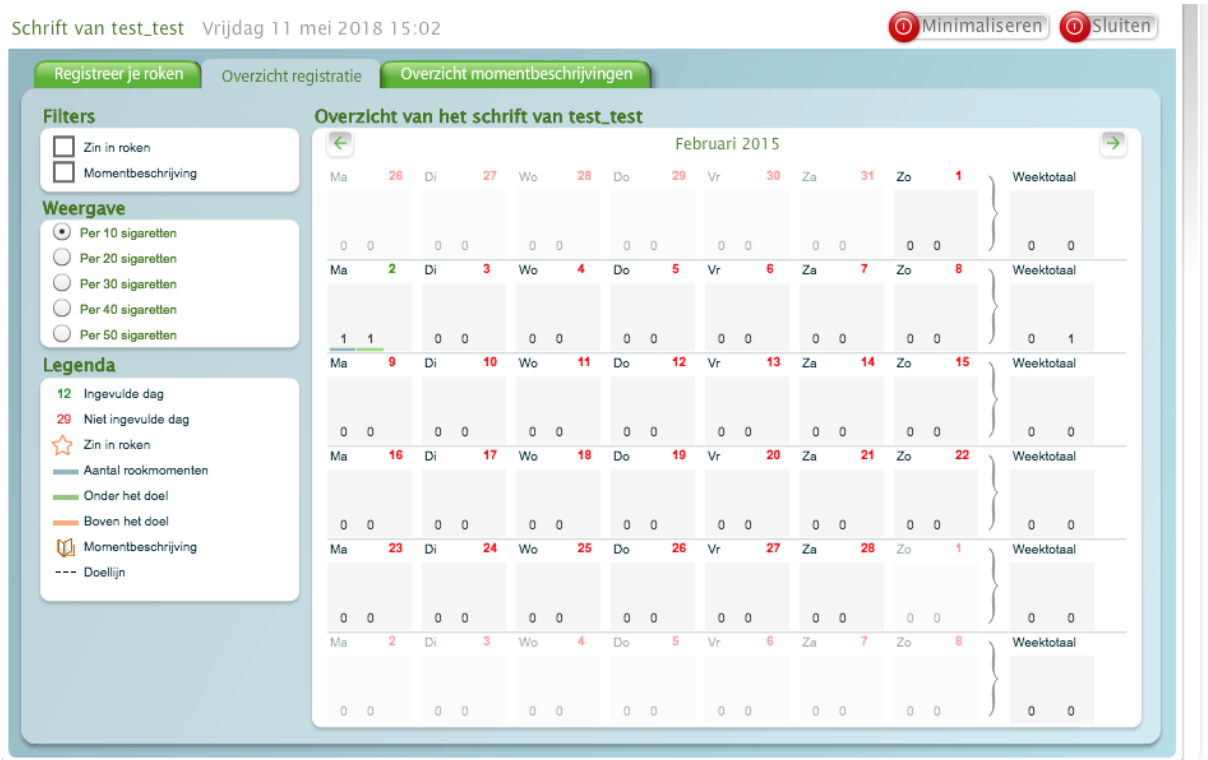

## Moment descriptions

Here the patient can record the following characteristics for a smoking situation:

- Time of day
- Level of craving
- Cigarette brand
- Number of cigarettes smoked
- Level of smoking pleasure
- Situation (where, alone/not alone, busy with what, event)
- Thoughts
- Emotions
- Behavior

Furthermore, patients can print moment descriptions (either all or per day).

The screenshot shows a web application interface for recording smoking moments. At the top, it displays the user name 'Schrift van test\_test' and the date 'Vrijdag 11 mei 2018 15:02'. There are two buttons: 'Minimaliseren' and 'Sluiten'. Below this, there are three tabs: 'Registreer je roken', 'Overzicht registratie', and 'Overzicht momentbeschrijvingen'. The 'Overzicht momentbeschrijvingen' tab is active. On the left, there is a calendar for February 2015. The date '2' is selected. Below the calendar is a legend: '12 Ingevulde dag', '29 Niet ingevulde dag', '17 Dag met momentbeschrijving', '5 Huidige datum', and '23 Geselecteerde datum'. At the bottom left, there are two buttons: 'Print beschrijvingen per dag' and 'Print alle momentbeschrijvingen'. The main content area shows a record for 'Maandag 02 Februari 2015' at '12:00 uur'. The record details are: 'Zin in, gerookt | Trek: 4 | Gebruikelijke merk | Aantal: 1 | Rookgenot: 1'. The record is divided into sections: 'Situatie' (Waar: Dit is een test; Ik was (daar met): alleen; Bezigheid: asdsfdadf; Gebeurtenis: sd), 'Gedachten' (sofasdf), 'Gevoel' (gespannen, bezorgd with a sad face emoji), and 'Gedrag' (sdfdsf, sdf).
