# Supplementary material for: Patients’ User Experience of a Blended Face-to-Face and Web-Based Smoking Cessation Treatment: Qualitative Study
Source: PubMed Central journal article supplement (PMC7301265; doi:10.2196/14550), 2020-06-03
Supplement: formative_v4i6e14550_app3.pdf [file formative_v4i6e14550_app3.pdf]

Multimedia Appendix 2. Codes, code description, and intercoder agreement per semantic domain

| Semantic Domain | Code                                  | Description                                                                                                                                                                                                                                                                                                                                                           | Krippendorff's c- $\alpha$ -binary |
|-----------------|---------------------------------------|-----------------------------------------------------------------------------------------------------------------------------------------------------------------------------------------------------------------------------------------------------------------------------------------------------------------------------------------------------------------------|------------------------------------|
| User Experience | ux bsct                               | User experience with the blended treatment - Phrases in which the patient describes an experience during the treatment which he/she also combines with an evaluation and/or emotion (e.g. "good", "bad", "frustrating")<br>Only the phrases that refer to the blended treatment, Not the ones referring only to F2F, or WEB or others (episodic and/or cumulative UX) | 0.676                              |
|                 | ux f2f                                | User experience with the F2F parts of BSCT - As ux bsct, but only referring to the F2F parts of BSCT                                                                                                                                                                                                                                                                  |                                    |
|                 | ux web                                | User experience with the WEB parts of BSCT - As ux bsct, but only referring to the WEB parts of BSCT                                                                                                                                                                                                                                                                  |                                    |
|                 | ux others                             | User experience that cannot be related to other UX Codes - As above, but only if not referring to the other three UX codes                                                                                                                                                                                                                                            |                                    |
| System          | motivation to follow bsct             | Motivation to continue the treatment - The motivation to adhere to the treatment which are closely related to properties of the treatment itself, e.g. supporting elements of the treatment,                                                                                                                                                                          | 0.650                              |
|                 | presence of counselor online          | What the patient thinks about the counselor while he/she is in the web-based part of the treatment - Description and ideas about what the patient thinks about the counselor while he/she is using the Web-based parts of the treatment, e.g. "having the counselor in mind while using the tools" or "feels like filling in a tax declaration"                       |                                    |
| User            | earlier treatment experience          | Prior experience in F2F and WEB treatment/counseling - This is about treatment/counseling IN GENERAL, for prior experience in smoking cessation use code „smoking cessation experience. All experience in BSCT comparable treatment including treatment and counseling in health- or behavior related topic in an f2f, Web-based and/or group setting.                | 0.726                              |
|                 | expectation towards bsct              | Expectation at treatment start - What patients expected when they were informed to be included in BSCT (anticipated UX)                                                                                                                                                                                                                                               |                                    |
|                 | health status                         | Additional information about health and mental status - Additional information about health and mental status which is not closely related to the motivation (use Motivation quitting OR Motivation BSCT)                                                                                                                                                             |                                    |
|                 | it experience                         | Experience in using digital technology for communication - How the patient describes himself/herself in the use of computers, tablets, mobiles etc. for communication                                                                                                                                                                                                 |                                    |
|                 | mood during smoking cessation         | Moods/emotions related to quitting - Description of moods and emotions related to quitting smoking. (only if not explicitly related to BSCT - use UX-codes for these)                                                                                                                                                                                                 |                                    |
|                 | motivation for smoking cessation      | Motivation to quit or to stay abstinent - The motivation to quit and/or to stay abstinent which are not closely related to aspects of the treatment, but more related to e.g. smoking, health, family.                                                                                                                                                                |                                    |
|                 | smoking cessation experience          | Experience in smoking cessation treatment - Earlier experience in smoking cessation AND current experience in smoking cessation which is not related to the current treatment                                                                                                                                                                                         |                                    |
| Context         | physical context                      | Information about the physical context - Additional information about the physical context (e.g. housing situation, travel time) which is not closely related to the motivation (use Motivation quitting OR Motivation BSCT)                                                                                                                                          | 0.780                              |
|                 | social context                        | Information about the social context - Additional information about the social context (e.g. partner, friends, family) which is not closely related to the motivation (use Motivation quitting OR Motivation BSCT)                                                                                                                                                    |                                    |
|                 | task context                          | What patients think about the structure and freedom during treatment - If not directly related to Motivation or UX                                                                                                                                                                                                                                                    |                                    |
|                 | technical context                     | Information about the technological context - Information about the technological context such as computers, laptops, internet connection. Use only if phrase is not referring to Motivation or UX                                                                                                                                                                    |                                    |
| Structural      | improvements                          | Ideas and recommendations for further improvement of BSCT                                                                                                                                                                                                                                                                                                             | 0.928                              |
|                 | intake                                | How the patients were informed before start of the treatment - Phrase of patients in which they describe the quality of the intake procedure and which are helpful for improvement of the treatment (do not mix up with Expectation)                                                                                                                                  |                                    |
|                 | name of the treatment                 | Phrases of the patient in which he/she calls or describes BSCT in his/her own words in a "striking" expression                                                                                                                                                                                                                                                        |                                    |
|                 | patient characteristics matching bsct | Characteristics of users that increase matching between treatment and user - Phrases of patients in which he/she describes characteristics of users that best match with BSCT, e.g. "you need to be computer-literate"                                                                                                                                                |                                    |
|                 | procedures                            | Additional information about the procedures of the treatment - Phrase of patients in which they describe the procedures of the treatment and which are helpful for improvement of the treatment, but which are not closely related to the UX                                                                                                                          |                                    |
| Miscellaneous   | advantages                            | Phrases in which the patient summarizes advantages of BSCT                                                                                                                                                                                                                                                                                                            | 0.744                              |
|                 | disadvantages                         | Phrases in which the patient summarizes disadvantages of BSCT                                                                                                                                                                                                                                                                                                         |                                    |
|                 | preference of treatment mode          | Which kind of treatment the patient would prefer next time or advise to others - Phrases in which the patients evaluate the modes of the treatment by telling which mode of treatment he/she would go for next time or he/she would advise to others                                                                                                                  |                                    |
|                 | miscellaneous                         |                                                                                                                                                                                                                                                                                                                                                                       |                                    |
