# Supplementary material for: Patients’ User Experience of a Blended Face-to-Face and Web-Based Smoking Cessation Treatment: Qualitative Study
Source: PubMed Central journal article supplement (PMC7301265; doi:10.2196/14550), 2020-06-03
Supplement: formative_v4i6e14550_app4.pdf [file formative_v4i6e14550_app4.pdf]

## (1) Patients' standards and expectations

| Randomization number           | #10                                                                         | #12                                                                                                                                                                                                                                                                                                                                                                                             | #14                                                                                                                    | #25                                                                                                                                                                                                                                                                                                                                                                                                                                                                                                                                                                 | #27                                                                                                                                                                            | #34                                                                                                                                                                                                            | #53                                                                                                                             | #75                                                                                     | #106                                                                                                                                          | #509                                                                                                                                                                                                                                                      |
|--------------------------------|-----------------------------------------------------------------------------|-------------------------------------------------------------------------------------------------------------------------------------------------------------------------------------------------------------------------------------------------------------------------------------------------------------------------------------------------------------------------------------------------|------------------------------------------------------------------------------------------------------------------------|---------------------------------------------------------------------------------------------------------------------------------------------------------------------------------------------------------------------------------------------------------------------------------------------------------------------------------------------------------------------------------------------------------------------------------------------------------------------------------------------------------------------------------------------------------------------|--------------------------------------------------------------------------------------------------------------------------------------------------------------------------------|----------------------------------------------------------------------------------------------------------------------------------------------------------------------------------------------------------------|---------------------------------------------------------------------------------------------------------------------------------|-----------------------------------------------------------------------------------------|-----------------------------------------------------------------------------------------------------------------------------------------------|-----------------------------------------------------------------------------------------------------------------------------------------------------------------------------------------------------------------------------------------------------------|
| Standard (F2F treatment)       |                                                                             | F2F is ideal<br>F2F adapts to your competences                                                                                                                                                                                                                                                                                                                                                  | F2F is harder if you do not like the counselor<br>Written information has less impact than F2F                         |                                                                                                                                                                                                                                                                                                                                                                                                                                                                                                                                                                     | No earlier F2F treatment<br>Following treatment if it is paid by the insurance company                                                                                         | Uses mindfulness app<br>Earlier group therapy (heart revalidation), which did not meet his needs                                                                                                               | No earlier F2F treatment<br>Experienced in mindfulness myocardial infarction<br>You just have to do the things                  | Human touch is important                                                                |                                                                                                                                               | No earlier F2F treatment                                                                                                                                                                                                                                  |
| Standard (IT)                  | Computer is not my way<br>I am able to use computers<br>I don't like online | I am not a computer freak<br>It is too easy to lie and you have to be serious to do it.<br>You have to be a computer freak and not been interested in personal touch, able to process written information<br>Correctness: You have to be 100% correct for web. Age: Young people are skilled with computers, but not interested in health. Older people do not like and do not trust computers. | don't want a computer in the living room                                                                               | I followed all IT developments<br>I use the laptop less since I have a tablet<br>Computer is a tool<br>I don't like to be accessible 24/7<br>I don't like messenger apps<br>Neither a forerunner nor a left behind<br>Written has more impact it is a problem of generation<br>You do not remember information because it is always accessible<br>I use books less<br>Tablet is playing, Laptop is serious (=smoking cessation)<br>I can't imagine spending much money (>50€/month) on a mobile phone<br>Online information is not as important as written on paper | Prefers mobile (Facebook, WhatsApp, Talking) instead of laptop<br>I do not check my emails regularly<br>I only check my emails after being reminded<br>I prefer mobile over PC | Used to computers because of work.<br>I personalize my mobile<br>I am a technician and used to computers<br>is easier to do sloppy<br>It is easy to cheat online<br>Web you can do sloppy<br>Conscientiousness | Used to computers<br>Computer mediated communication lead to misunderstandings<br>I prefer F2F communication for relevant stuff | Computer is a tool<br>Everyone knows computers are relevant and may be an addition      | I go for everything mobile<br>I prefer mobile over PC<br>I use standard apps<br>Today, children grow up with mobiles<br>Use google for search | Use computers on a „needs“ basis, for getting things done<br>Computer is a tool<br>I am not interested in high end smartphones<br>Facebook is nonsense<br>Texting can be useful sometimes<br>Use google for search<br>I do not trust internet information |
| Standard (Web-based treatment) |                                                                             |                                                                                                                                                                                                                                                                                                                                                                                                 |                                                                                                                        | Online is useful treatment as “a big stick” („stock achter de deur“)                                                                                                                                                                                                                                                                                                                                                                                                                                                                                                | No earlier Web treatment                                                                                                                                                       | Uses mindfulness app<br>I have the Stoptober app<br>Web                                                                                                                                                        | No earlier Web treatment                                                                                                        |                                                                                         |                                                                                                                                               | No earlier Web treatment                                                                                                                                                                                                                                  |
| Standard (quitting)            | Pleasure not to smoke<br>Stress causes relapse                              | Stopping you have to do for yourself                                                                                                                                                                                                                                                                                                                                                            | You must have the will<br>Treatment only makes sense if you have the will to stop<br>With help stopping will be easier |                                                                                                                                                                                                                                                                                                                                                                                                                                                                                                                                                                     | Stress causes relapse<br>It is more mental than physical problem<br>You have to be strong<br>Weight gain impacts smoking cessation<br>It's up on you                           | Earlier unsuccessful quitting attempts (without treatment)<br>Smoking is bad<br>Stress at work triggers smoking                                                                                                | Earlier unsuccessful quitting attempts (without treatment)<br>With help stopping will be easier<br>Examples and warnings        | circumstances cause relapse<br>Stress causes relapse<br>other medication causes relapse | Earlier unsuccessful stop smoking therapy with medication only                                                                                |                                                                                                                                                                                                                                                           |
| Expectation (treatment)        | Counselors will be “a big stick”                                            | Web will not work for me,                                                                                                                                                                                                                                                                                                                                                                       | Wait and see because it is new<br>Sounds interesting                                                                   | You simply have to do it, even if it is not fun<br>No clear idea<br>I did it because I thought it was obligatory<br>Thinking it was obligatory did not increase motivation for the treatment                                                                                                                                                                                                                                                                                                                                                                        | Neutral, no expectations, no clear picture<br>expected long examination                                                                                                        | to make a new step to get more grip on smoking cessation<br>No clear idea<br>Web will be comfortable to get told how to stop and how it will be supported                                                      | support in smoking cessation<br>open                                                                                            | Open, no clear expectation or picture, hope to reduce smoking                           | Neutral, no expectations                                                                                                                      | Good expectations, because you will make it                                                                                                                                                                                                               |

## (2) Apparent character of BSCT - pragmatic attributes

| Randomization number | #10                                                                                                                                                                              | #12                                                                                                                             | #14                                                                                                                                                                                                                                                                                                                                                                                                                                                      | #25                                                                                                                                     | #27                                                                                                                                                                                                                                                                                                                                                                                     | #34                                                                                                                                  | #53                                                                                                                                                   | #75                                                                                                              | #106                                                                                                                                                                                                                                                        | #509                                                                                                                                                                                     |
|----------------------|----------------------------------------------------------------------------------------------------------------------------------------------------------------------------------|---------------------------------------------------------------------------------------------------------------------------------|----------------------------------------------------------------------------------------------------------------------------------------------------------------------------------------------------------------------------------------------------------------------------------------------------------------------------------------------------------------------------------------------------------------------------------------------------------|-----------------------------------------------------------------------------------------------------------------------------------------|-----------------------------------------------------------------------------------------------------------------------------------------------------------------------------------------------------------------------------------------------------------------------------------------------------------------------------------------------------------------------------------------|--------------------------------------------------------------------------------------------------------------------------------------|-------------------------------------------------------------------------------------------------------------------------------------------------------|------------------------------------------------------------------------------------------------------------------|-------------------------------------------------------------------------------------------------------------------------------------------------------------------------------------------------------------------------------------------------------------|------------------------------------------------------------------------------------------------------------------------------------------------------------------------------------------|
| Usability (BSCT)     | Intake was good<br>Procedures are fine<br>Intervals between session are too long<br>Treatment is picked up well<br>BSCT is easy-to use<br>F2F and Web are equally time demanding | Long waiting list                                                                                                               | Everything was explained well that was all quite logical<br>Long waiting list<br>Long time in the waiting area<br>Not clear where to turn to outside the office hours<br>Everything was clear<br>BSCT parts connect to each other<br>You can ask F2F if you have questions about Web                                                                                                                                                                     | Not everything was explained in detail<br>I was surprised about the order of sessions<br>Expected intervals between F2F to be shorter   | Treatment is picked up well<br>I was called to be reminded of my sessions                                                                                                                                                                                                                                                                                                               | Everyone is kind<br>Less travel<br>No parking problems<br>Less time consuming                                                        | Everything was clear<br>BSCT is easy-to-use<br>BSCT parts connect to each other<br>Treatment is picked up well<br>Intervals between sessions are fine | I was introduced well to the treatment<br>No problems<br>BSCT parts connect to each other<br>F2F and Web support | BSCT parts connect to each other                                                                                                                                                                                                                            | No problems                                                                                                                                                                              |
| Usability (F2F)      | Counselor does not have enough time<br>Disadvantage:<br>Travelling to hospital                                                                                                   | Counselor does not have enough time                                                                                             | Counselor does not have enough time<br>F2F is slow and time consuming<br>Less travel                                                                                                                                                                                                                                                                                                                                                                     | F2F is easy to use                                                                                                                      | F2F is easier than Web<br>F2F is slow and time consuming                                                                                                                                                                                                                                                                                                                                |                                                                                                                                      |                                                                                                                                                       |                                                                                                                  |                                                                                                                                                                                                                                                             |                                                                                                                                                                                          |
| Usability (Web)      | Online is difficult                                                                                                                                                              |                                                                                                                                 | Online is easy to understand<br>Online is easy to use<br>Web you do not get immediate response<br>Online is a lot of repetition                                                                                                                                                                                                                                                                                                                          | Online is difficult<br>Online is NOT easy to use<br>Online is efficient (saves time)<br>If online is important I will print it on paper | Online is a lot of repetition<br>Online is easy to use<br>I did not receive online assignments<br>Web you have to log in each time and you have to remember your password<br>Web you have to do very often<br>Online information that has to be filled in should be link to earlier data, so that you do not fill in twice<br>Easier Login so you do not have to remember your password | Online is not easy to use<br>Emails/phone calls raise awareness<br>Filing in forms online is handy<br>Web is more practical than F2F | Online is a lot of repetition<br>Online is easy to use                                                                                                | Online is easy to use<br>I enjoyed being notified automatically about new Web content                            | I did the smoking registration on paper before doing it online<br>Keeping the smoking diary on paper is simpler than online<br>Online is easy to use<br>Online is too time demanding<br>During work I kept record of smoking on paper, which is double work | Online is too time demanding<br>I did the smoking registration on paper before doing it online<br>Online is too time demanding<br>Online is easy to use<br>Online is a lot of repetition |
| Utility (BSCT)       |                                                                                                                                                                                  |                                                                                                                                 |                                                                                                                                                                                                                                                                                                                                                                                                                                                          | Setting goals is important<br>Changing habits is important                                                                              | BSCT offers support<br>Solution-focused therapy                                                                                                                                                                                                                                                                                                                                         |                                                                                                                                      | All BSCT parts were helpful – some more, some less<br>BSCT did match my quitting process                                                              | Web only would not have offered what I needed<br>It is good talk about it later                                  | All has been discussed<br>There is progress                                                                                                                                                                                                                 |                                                                                                                                                                                          |
| Utility (F2F)        | Counselors stimulated<br><br>F2f stimulates more than Web                                                                                                                        | F2F works for me only<br>Counselor does not offer enough support<br>Counselor does not motivate<br>Counselor does not reinforce | It was offered to ask questions every time<br>Counselors stimulated quitting<br>All has been discussed<br>Counselor offers support<br>Counselors explained everything very well<br>Counselors explained everything very well<br>F2F you get direct answers<br>F2F fast answers on questions<br>F2F it is easier to ask questions<br>Medication was done in consultation with the counselor<br>Following treatment after stopping is not necessary but OK | Counselors reinforce<br>Counselor offers support<br>F2F you get written information                                                     | Counselor does not offer enough support<br>Counselors asks too much questions<br>Counselor does not offer enough support                                                                                                                                                                                                                                                                | F2f you can't hide<br>Counselor does not offer enough support<br>Counselor did not discuss alternatives                              | Counselors reinforce<br>Counselor offers support<br>Counselors shares good metaphors                                                                  | F2F offers flexibility<br>It is good to talk after a fail                                                        | F2F+mediation is better than medication only                                                                                                                                                                                                                | I talked to the counselor about all of my problems<br>More personal contact                                                                                                              |
| Utility (Web)        | Multiple choice questions are annoying                                                                                                                                           |                                                                                                                                 | Online you do not get immediate answers to questions<br>Information available online<br>Online did not match my quitting process<br>Computer does not answer                                                                                                                                                                                                                                                                                             |                                                                                                                                         | Online does not match my quitting process<br>Information available online                                                                                                                                                                                                                                                                                                               | Information available online after finalizing treatment                                                                              | Online offers support in difficult moments<br>NRT offers more support than Web in difficult moments<br>Online offers tips                             | Online does not work for me                                                                                      | I was reinforced to work online<br>Online offers too much information<br>App short reminders (several times a day) to track smoking shorter texts                                                                                                           | Online registration is so time demanding that it prevents smoking<br>Reporting via Web Weekly report about own smoke behavior (not several time a day tracking)                          |

## (2) Apparent character of BSCT - hedonic attributes

| Randomization number  | #10                                                                                    | #12                                                                                                                                                                | #14                                                                                                   | #25                                                                                                                                      | #27                                                                                                                                                              | #34                                                                                                                                                                                                    | #53                                                                                       | #75                                                                                                                                                                 | #106                                                                        | #509                                                                                                                                                                                  |
|-----------------------|----------------------------------------------------------------------------------------|--------------------------------------------------------------------------------------------------------------------------------------------------------------------|-------------------------------------------------------------------------------------------------------|------------------------------------------------------------------------------------------------------------------------------------------|------------------------------------------------------------------------------------------------------------------------------------------------------------------|--------------------------------------------------------------------------------------------------------------------------------------------------------------------------------------------------------|-------------------------------------------------------------------------------------------|---------------------------------------------------------------------------------------------------------------------------------------------------------------------|-----------------------------------------------------------------------------|---------------------------------------------------------------------------------------------------------------------------------------------------------------------------------------|
| Stimulation (BSCT)    | Web was not motivating                                                                 | I was reinforced to do Web                                                                                                                                         | BSCT stimulated quitting<br>BSCT is interesting<br>BSCT is different from F2F only                    | You just have to do the things<br>Dealing with tempters was not new                                                                      | Not digging so deep always the same questions is demotivating<br>Digging too deep is demotivating<br>contradictory goals (quitting, weight reduction) demotivate | BSCT did not offer new things<br>More positive reinforcement Because it made me think                                                                                                                  |                                                                                           |                                                                                                                                                                     | Because it made me think                                                    | digging deeper                                                                                                                                                                        |
| Stimulation (F2F)     |                                                                                        | Counselor has no impact<br>Counselor does not care whether I quit Smoking<br>CO measurement stimulates quitting<br>Discussing costs of smoking stimulates quitting | Counselor has no impact                                                                               | Counselors stimulate                                                                                                                     | Counselor „digs too deep”<br>Counselor has no impact                                                                                                             |                                                                                                                                                                                                        | Counselors stimulated quitting<br>Counselors reinforce CO measurement stimulates quitting |                                                                                                                                                                     | Counselor reinforced<br>Counselor made me think about the risks of smoking  | Counselor has no impact                                                                                                                                                               |
| Stimulation (Web)     | Online is not interesting                                                              |                                                                                                                                                                    | Online won't get through to me<br>Online is not interesting<br>Online offers possibility to look back | Online exchange with the counselor does not affect extraordinary<br>Online won't get through to me.                                      |                                                                                                                                                                  | I was reinforced to work online<br>Online won't get through to me                                                                                                                                      | Online won't get through to me.<br>Online stimulates to think                             | Online offers possibility to look back<br>First it is technical<br>It broadens your awareness                                                                       | Computer use demotivates                                                    | Online motivation decreases over time<br>I was reinforced to work online<br>Online exchange with the counselor does not affect extraordinary<br>Online motivation decreases over time |
| Identification (BSCT) |                                                                                        |                                                                                                                                                                    | You do not know who has written the content                                                           | I had to make the best out of it<br>I do not do it for no one<br>In F2F session it became clear that the counselor reads the Web content | Lose your rhythms<br>Fells treated like a child                                                                                                                  |                                                                                                                                                                                                        |                                                                                           | Able to work based on reading and writing<br>Perseverance                                                                                                           |                                                                             | I have contact with here<br>They know something about me                                                                                                                              |
| Identification (F2F)  | I like the counselors (“Talking to the ladies”)                                        |                                                                                                                                                                    |                                                                                                       |                                                                                                                                          |                                                                                                                                                                  |                                                                                                                                                                                                        | F2f feels more familiar                                                                   |                                                                                                                                                                     | I like the F2F sessions the most                                            |                                                                                                                                                                                       |
| Identification (Web)  | Online is not my style<br>Too stupid for IT<br>Age<br>IT skills<br>I don't like online | Online is not my style Computers does not talk to you, you do not get the feeling that there is a human being on the other side                                    | Computer does not talk back                                                                           | I don't benefit from Web because it is not my style<br>Prefer on paper                                                                   |                                                                                                                                                                  | You know there is someone behind it                                                                                                                                                                    | I had the idea that it is used on the other side                                          | Online does not give the opportunity to make it more personal<br>Web I do for myself<br>Self-control to follow Web<br>I know why I do Web. I understand the process | I don't feel like it much<br>I don't like online                            |                                                                                                                                                                                       |
| Evocation             | Online is like filling in tax forms                                                    |                                                                                                                                                                    | Online feels like bookkeeping                                                                         |                                                                                                                                          | Computer is like paper<br>Audio information (listening to text)                                                                                                  | An app would be better than Web<br>Online feels like bookkeeping<br>short reinforcements via WhatsApp, Email in-between sessions<br>Video instructions<br>helpdesk, chat support<br>short instructions | Online feels like bookkeeping Online is like a manual                                     |                                                                                                                                                                     | Like handling a machine, because you are not sitting opposite to each other |                                                                                                                                                                                       |



## (4) Consequences

| Randomization number  | #10                                                                                                                                                                                      | #12                                                   | #14                                                                                                                                                                                                                                      | #25                                                                   | #27                                                                                          | #34                                                                                                                                                             | #53                                                                                                            | #75                                                                           | #106                                                                        | #509                                                                                                                                                                                                                                 |
|-----------------------|------------------------------------------------------------------------------------------------------------------------------------------------------------------------------------------|-------------------------------------------------------|------------------------------------------------------------------------------------------------------------------------------------------------------------------------------------------------------------------------------------------|-----------------------------------------------------------------------|----------------------------------------------------------------------------------------------|-----------------------------------------------------------------------------------------------------------------------------------------------------------------|----------------------------------------------------------------------------------------------------------------|-------------------------------------------------------------------------------|-----------------------------------------------------------------------------|--------------------------------------------------------------------------------------------------------------------------------------------------------------------------------------------------------------------------------------|
| Appeal (BSCT)         |                                                                                                                                                                                          |                                                       | Mix of talking and reading<br>Sometimes F2F is better – sometimes Web is better<br>BSCT is good idea                                                                                                                                     | Good<br>I do not do it for no one                                     | BSCT is good<br><br>Champix was good                                                         | F2f and Web are quite different                                                                                                                                 | BSCT is good<br>Web only would not have been so easy<br>Web is an extension of F2F                             | BSCT is good<br>BSCT offers variety<br>I had to go to the hospital less often | BSCT is good<br>Shared information both F2F and Web is fine                 |                                                                                                                                                                                                                                      |
| Appeal (F2F)          |                                                                                                                                                                                          | F2F touches your heart<br>100% personal in all facets |                                                                                                                                                                                                                                          |                                                                       | Counselor is nice<br>F2F session are “whiny”                                                 | F2F talks are most important at treatment start<br>Counselor has a “stiff posture”<br>Counselor is pedantic<br>Online is cumbersome<br>Counselor is annoying me | F2F talks are most important                                                                                   |                                                                               | F2F is finer than Web                                                       | F2F talks were fine                                                                                                                                                                                                                  |
| Appeal (Web)          | Online is dead<br>Online is nonsense                                                                                                                                                     | Web is nonsense                                       | Online yielded nothing                                                                                                                                                                                                                   | Not Web only<br>Online is a serious matter                            | Online is a lot<br>Online is boring<br>Online is tiring                                      | Online is boring<br>Comfortable at home                                                                                                                         | Online yielded nothing                                                                                         | Online yielded nothing<br>Online is nice                                      | Online is cumbersome (compared to apps)                                     | Online is a lot<br>Online yielded nothing                                                                                                                                                                                            |
| Emotion (BSCT)        | I am satisfied with BSCT                                                                                                                                                                 | Feeling abandoned and left alone                      |                                                                                                                                                                                                                                          | I am not satisfied with BSCT<br>F2F and Web stimulated the same moods | I am satisfied with BSCT<br>Inconsistent/Contradictory quitting smoking and weight reduction | I am not satisfied with BSCT                                                                                                                                    |                                                                                                                | Needed to relax physically tension                                            | I am thankful                                                               |                                                                                                                                                                                                                                      |
| Emotion (F2F)         |                                                                                                                                                                                          |                                                       |                                                                                                                                                                                                                                          |                                                                       | F2F sessions were in a good mood                                                             | guilty because I did not stick to appointments                                                                                                                  | F2F session were in a good mood                                                                                |                                                                               |                                                                             |                                                                                                                                                                                                                                      |
| Emotion (Web)         |                                                                                                                                                                                          |                                                       |                                                                                                                                                                                                                                          |                                                                       | Online is unpleasant                                                                         | Keeping the online smoking diary makes me nervous                                                                                                               |                                                                                                                |                                                                               |                                                                             |                                                                                                                                                                                                                                      |
| Emotion (quitting)    | it is hard<br>I had to fight while being somehow depressed<br>Grumpy<br>Rotten mood<br>Indifferent if I am over the hump ups and downs<br>I had to fight<br>Craving while being stressed |                                                       | No craving<br>100% lucky<br>it was easy<br>not grumpy<br>good mood<br>I had to fight for some days, then it was easy<br>I did it myself<br>has been very strange and that's why I say that I have never experienced that it went so easy | Changing mood<br>Weak and guilty because I did not stop               | Inconsistent<br>Disgust<br>Fight with yourself<br>Relapse felt dirty                         | Proud<br>it is hard<br>need for support<br>annoyed about myself                                                                                                 | Stress<br>comfortable<br>not grumpy<br>feeling good because of success                                         | Stress                                                                        |                                                                             | stress                                                                                                                                                                                                                               |
| Behaviour (treatment) | I did not do online.<br>Online I did sloppy                                                                                                                                              | Non-adherend,                                         | I did everything online<br>Following treatment to do the counselors/researchers a favor<br>Could have stopped after 4 times, because I was sure<br>do not need it in the future<br>adherent/                                             | I did both F2f and Web<br>I did not do online<br>Online I did sloppy  | I forgot about some of my session<br>I used both “on paper” and Web<br>Online I did sloppy   | Online I did sloppy<br>tracking my smoking increased smoking                                                                                                    | I did both F2f and Web                                                                                         | Adherent,                                                                     | Online I did sloppy                                                         |                                                                                                                                                                                                                                      |
| Behavior (quitting)   |                                                                                                                                                                                          | non-quitter                                           | quitter                                                                                                                                                                                                                                  |                                                                       |                                                                                              |                                                                                                                                                                 | I told myself „Never again”<br>I told myself „enough” (basta)<br>I saved money for the holidays with my family | reduced smoking                                                               | No problems because I had medication (Champix)<br>I threw away my last shag | Pain in my leg made me smoke<br>I smoke less<br>You smoke less if you have too much work<br>Online registration is so time consuming that it prevents smoking<br>I do not smoke for hours in the sleeping room or if I am quite busy |
